# Supplementary material for: Association Between Tumor Necrosis Factor Inhibitor Exposure and Inflammatory Central Nervous System Events
Source: PubMed Central journal article supplement (PMC7235930; doi:10.1001/jamaneurol.2020.1162), 2020-05-18
Supplement: jamaneurol-77-937-s001.pdf [file jamaneurol-77-937-s001.pdf]

## Supplementary Online Content

Kunchok A, Aksamit AJ Jr, Davis JM III, et al. Association between tumor necrosis factor inhibitor exposure and inflammatory central nervous system events. *JAMA Neurol*. Published online May 18, 2020. doi:10.1001/jamaneurol.2020.1162

**eFigure 1.** Case-Control Inclusion Criteria

**eFigure 2.** Study Design

**eTable 1.** Disease Modifying Therapies Used by the Study Population at Any Point in Their Disease Course

**eTable 2.** Exclusions from CNS Diagnostic Code Search for Cases

**eTable 3.** Cases Stratified by Inflammatory Demyelinating and Non-demyelinating CNS Events for Each Systemic Autoimmune Disease

This supplementary material has been provided by the authors to give readers additional information about their work.

**eFigure 1: Case-Control Inclusion Criteria**

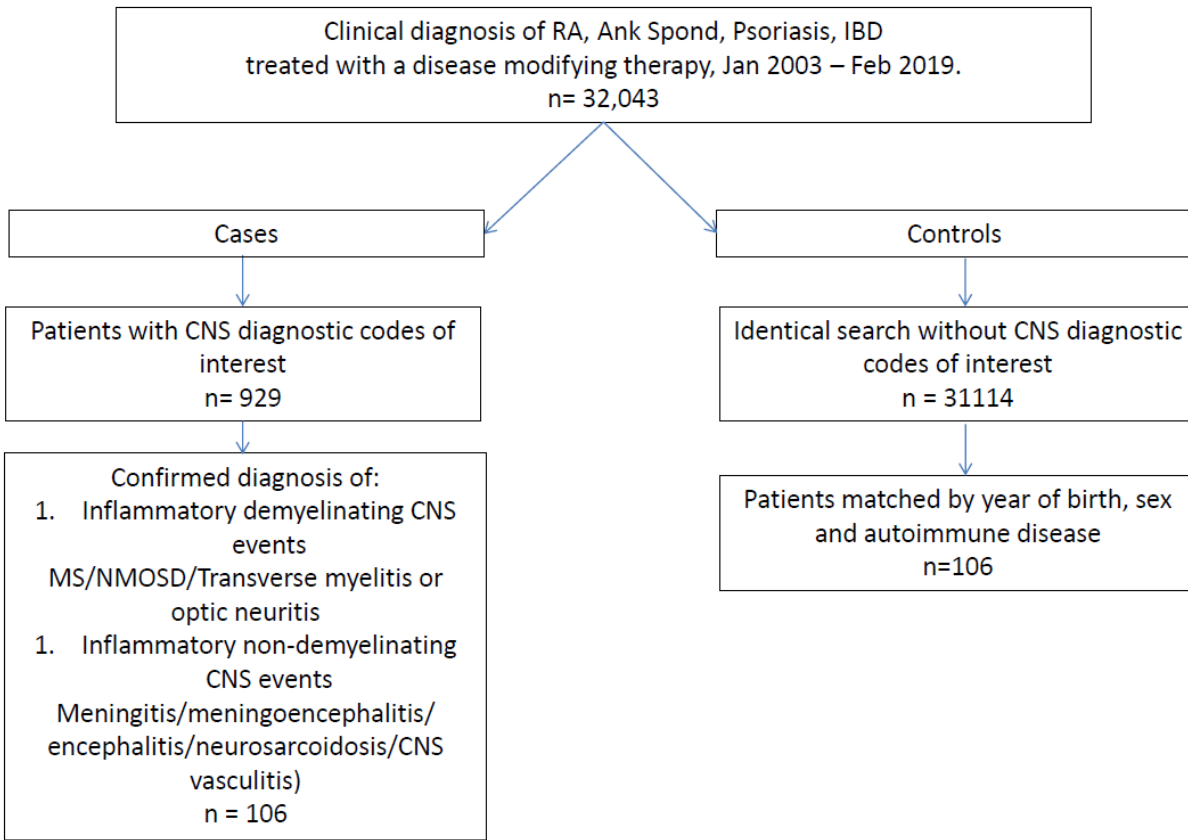

eFigure 2: Study Design

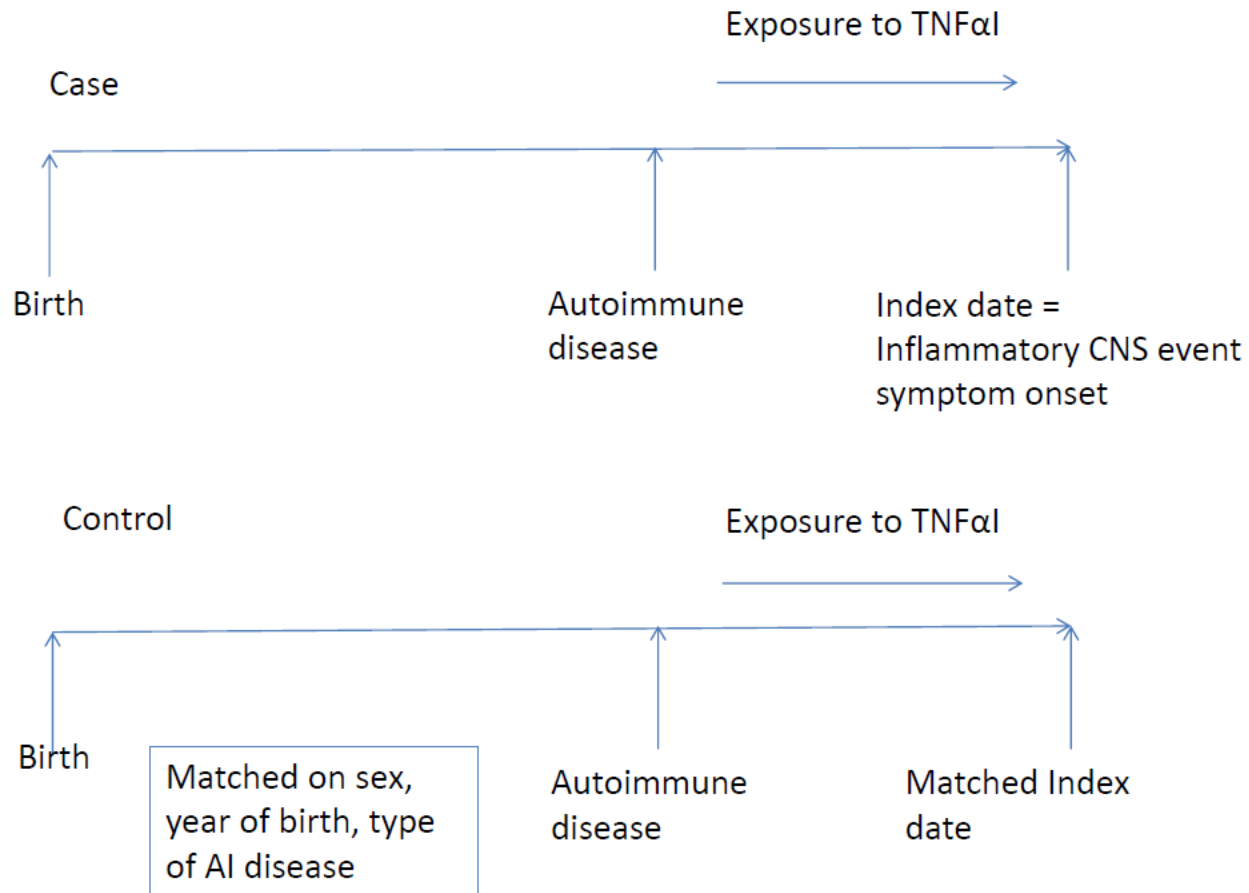

**eTable 1: Disease Modifying Therapies Use by the Study Population at Any Point in Their Disease Course**

| <b>Disease modifying therapies:</b> |
|-------------------------------------|
| Leflunomide                         |
| Azathioprine                        |
| Methotrexate                        |
| Hydroxychloroquine                  |
| Minocycline                         |
| Sulfasalazine                       |
| Gold                                |
| Cyclophosphamide                    |
| Mycophenolate                       |
| Cyclosporine                        |
| Anakinra                            |
| Sekukinumab                         |
| Ustekinumab                         |
| Abatacept                           |
| Rituximab                           |
| Tocilizumab                         |
| Natalizumab                         |
| Vedolizumab                         |
| Apremilast                          |
| Secukinumab                         |
| Ixekizumab                          |
| Brodalumab                          |
| Guselkumab                          |
| Tilrakizumab                        |
| Mesalamine                          |
| Etanercept                          |
| Infliximab                          |
| Adalimumab                          |
| Golimumab                           |
| Certolizumab                        |

**eTable 2: Exclusions From CNS Diagnostic Code Search for Cases**

| <b>Reason for exclusion</b>                                                                                                                                                                                                                                                                                                                                                                                                                                                                                                                                                                                                                                                                                                                                                                 | <b>n</b>   |
|---------------------------------------------------------------------------------------------------------------------------------------------------------------------------------------------------------------------------------------------------------------------------------------------------------------------------------------------------------------------------------------------------------------------------------------------------------------------------------------------------------------------------------------------------------------------------------------------------------------------------------------------------------------------------------------------------------------------------------------------------------------------------------------------|------------|
| <b>Cases not occurring during study period:</b> (prior to 2003 or prior to autoimmune disease onset)                                                                                                                                                                                                                                                                                                                                                                                                                                                                                                                                                                                                                                                                                        | 148        |
| <b>Malignancy:</b> Primary CNS malignancy (glioma, lymphoma, meningioma); paraneoplastic CNS disease; systemic malignancy (solid organ or haematological); secondary CNS (metastatic) disease                                                                                                                                                                                                                                                                                                                                                                                                                                                                                                                                                                                               | 22         |
| <b>Non-neurological diagnosis:</b> evaluation for MS negative, influenza, infectious mononucleosis, postural hypotension, spondylitis, chronic pain, systemic sarcoidosis but evaluation for CNS disease negative, systemic vasculitis but evaluation for CNS disease negative                                                                                                                                                                                                                                                                                                                                                                                                                                                                                                              | 437        |
| <b>Other neurological disorder:</b> ALS; myasthenia gravis, cerebral palsy; CIDP; migraines; myositis; peripheral neuropathy; CNS ischaemia; leukodystrophy; leukoencephalopathy; epilepsy (non-autoimmune); PRES; pachymeningitis due to CSF leak or IgG4 disease; skull base osteomyelitis; trigeminal neuralgia; tremor; haemangioma; cavernoma; osmotic demyelination syndrome; depression; narcolepsy; dementia; PML; toxic-metabolic encephalopathy; arachnoiditis; compressive myelopathy; infectious transverse myelitis; meningitis secondary to drugs, bacterial or viral meningitis; surgical meningitis(post ENT or neurosurgical intervention); optic neuropathy secondary to other causes (drugs, ischaemia, glaucoma, non-arteritic ischaemic, sellar lesions, trauma, IgG4) | 155        |
| <b>Lacking ancillary confirmative tests:</b> lack of confirmatory CSF or MRI                                                                                                                                                                                                                                                                                                                                                                                                                                                                                                                                                                                                                                                                                                                | 7          |
| <b>Autoimmune disease not confirmed:</b> autoimmune diagnosis removed or alternative autoimmune disease                                                                                                                                                                                                                                                                                                                                                                                                                                                                                                                                                                                                                                                                                     | 23         |
| <b>Immunodeficiency or immunocompromised:</b> solid organ transplant, stem cell transplant, congenital (common variable) or acquired immunodeficiency (HIV)                                                                                                                                                                                                                                                                                                                                                                                                                                                                                                                                                                                                                                 | 28         |
| <b>Cases meeting inclusion criteria but consent for research refused</b>                                                                                                                                                                                                                                                                                                                                                                                                                                                                                                                                                                                                                                                                                                                    | 3          |
| <b>Total</b>                                                                                                                                                                                                                                                                                                                                                                                                                                                                                                                                                                                                                                                                                                                                                                                | <b>823</b> |

**eTable 3: Cases Stratified by Inflammatory Demyelinating and Non-demyelinating CNS Events for Each Systemic Autoimmune Disease**

| <b>Autoimmune disease</b>         | <b>Total cases</b> | <b>Inflammatory demyelinating CNS events</b> | <b>Inflammatory non-demyelinating CNS events</b> |
|-----------------------------------|--------------------|----------------------------------------------|--------------------------------------------------|
|                                   | n                  | n (%)                                        | n (%)                                            |
| Rheumatoid arthritis              | 48                 | 26 (54)                                      | 22 (45)                                          |
| Ankylosing spondylitis            | 4                  | 1 (25)                                       | 3 (75)                                           |
| Psoriasis and Psoriatic arthritis | 21                 | 12 (57)                                      | 9 (43)                                           |
| Crohn's disease                   | 27                 | 14 (53)                                      | 13 (48)                                          |
| Ulcerative colitis                | 6                  | 3 (50)                                       | 3 (50)                                           |
